# Supplementary material for: Long-Term Outcomes of Adalimumab Treatment in 254 Patients with Crohn’s Disease: A Hospital-Based Cohort Study from Korea
Source: Springer Nature journal article supplement (doi:10.1007/s10620-017-4715-7), 2017-08-18
Supplement: MOESM2 [file 14224932]

**Supplementary Table 1.** Multivariate Cox regression analysis: Predictors of a poor response to adalimumab treatment in Korean patients with Crohn’s disease.

|  | **HR** | **95% CI** | ***P* value** |
| --- | --- | --- | --- |
| Disease duration prior to first ADA |  |  |  |
| ≤ 4 years | 1.00 | Reference | - |
| > 4 years | Not retained | Not retained | Not retained |
| Active perianal fistula at diagnosis |  |  |  |
| Without active perianal fistula | 1.00 | Reference | - |
| With active perianal fistula | 0.59 | 0.32-1.07 | 0.083 |
| Previous infliximab treatment prior to first ADA | D | D |  |
| Without previous IFX treatment | 1.00 | Reference | - |
| With previous IFX treatment | 1.77 | 1.09–2.86 | 0.021 |
| Baseline C-reactive protein at first ADA |  |  |  |
| ≤ 5 mg/dL | 1.00 | Reference | - |
| > 5 mg/dL | 2.34 | 1.19-4.60 | 0.014 |

*ADA*, adalimumab; *CI*, confidence interval; *IFX*, infliximab
